# Supplementary material for: Near‐infrared photoimmunotherapy (NIR‐PIT) on cholangiocarcinoma using a novel catheter device with light emitting diodes
Source: PubMed Central journal article supplement — Cancer Sci. 2021 Jan 8;112(2):828–38. doi: 10.1111/cas.14780 (PMC7894014; doi:10.1111/cas.14780), 2021-01-08
Supplement: CAS-112-828-s001.pdf [file CAS-112-828-s001.pdf]

## Near-infrared photoimmunotherapy (NIR-PIT) on cholangiocarcinoma using a novel catheter device with light emitting diodes (LEDs)

Hajime Hirata, Masaki Kuwatani, Kohei Nakajima, Yuki Kodama, Yasuo Yoshikawa, Mikako Ogawa and Naoya Sakamoto

### Supporting Information

Six million KMCH-1 cells suspended in 50  $\mu$ l of PBS and 50  $\mu$ l of Matrigel Matrix (Corning incorporated, NY, USA) were injected subcutaneously in the right side of the dorsum. Treatment was started after the tumor had reached a volume of 150 mm<sup>3</sup> following tumor cell injection. Four mice with a KMCH-1 tumor on the right dorsum were randomized into two groups to evaluate the effect of NIR-PIT with the NIR-LED catheter device: (group 1) 100  $\mu$ g of Tra-IR700 intravenous injection (i.v.) on day 0, with insertion of the NIR-LEDs catheter under the tumor and irradiated with NIR light for 1 h (72 J/cm<sup>2</sup>) and (group 2) no treatment (no i.v. injection without device). After treatments, the tumor volume of individual mice was measured three times a week for two weeks. The results were shown in Figure S1.

Figure S1

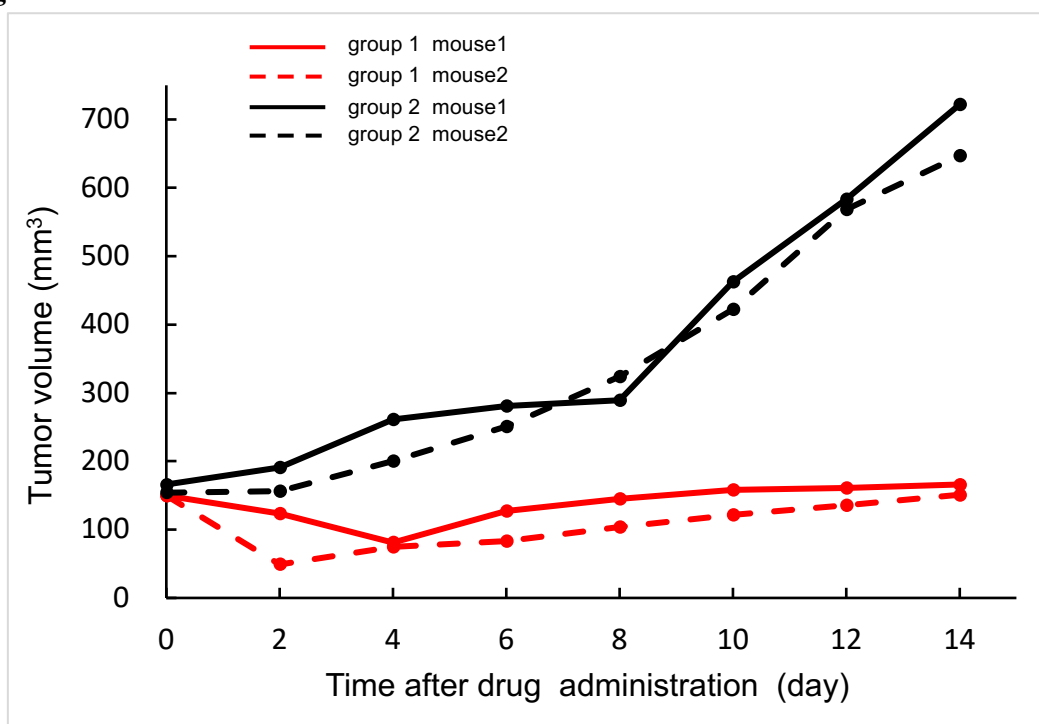

**Figure S1.**

Tumor growth curve in the four mice. The tumor volume of group 1 mice were significantly suppressed compared with that in group 2 mice.
